# Supplementary material for: Manipulation of the carbon storage regulator system for metabolite remodeling and biofuel production in Escherichia coli
Source: PubMed Central journal article supplement (PMC3460784; doi:10.1186/1475-2859-11-79), 2012-06-13
Supplement: 1475-2859-11-79-S3.pdf [file 1475-2859-11-79-S3.pdf]

Table S2: Whole cell proteomic analysis for CsrB elevation in *E. coli*.

| Protein ID | Description                                    | Spectral Counts |       |                 |       | Fold Change | Variance | Log <sub>2</sub> (Fold Change) | TIGR Roles            | TIGR Family   | TIGR Description                                                  |
|------------|------------------------------------------------|-----------------|-------|-----------------|-------|-------------|----------|--------------------------------|-----------------------|---------------|-------------------------------------------------------------------|
|            |                                                | Induced (Avg)   | Stdev | Uninduced (Avg) | Stdev |             |          |                                |                       |               |                                                                   |
| GigB       | glycogen branching enzyme                      | 14.03           | 1.06  | 0.84            | 0.01  | 16.71       | 0.01     | 4.06                           | Energy metabolism:    | TIGR01515 1,4 | Biosynthesis and degradation of polysaccharides                   |
| CysA       | sulfate/thiosulfate transporter subunit        | 5.82            | 2.05  | 0.84            | 0.01  | 6.93        | 0.12     | 2.79                           | Transport and binding | TIGR00968 sul | Anions                                                            |
| Yhil       | predicted HlyD family secretion protein        | 9.75            | 4.11  | 1.96            | 0.49  | 4.97        | 0.24     | 2.31                           | N/A                   | N/A           | N/A                                                               |
| GigC       | glucose-1-phosphate adenyltransferase          | 16.43           | 0.89  | 3.65            | 0.51  | 4.50        | 0.02     | 2.17                           | Energy metabolism:    | TIGR02091 glu | Biosynthesis and degradation of polysaccharides                   |
| IaaA       | L-asparaginase                                 | 5.45            | 2.30  | 1.69            | 0.86  | 3.23        | 0.44     | 1.69                           | N/A                   | N/A           | N/A                                                               |
| ToIC       | outer membrane channel; specific toleran       | 11.48           | 1.16  | 3.65            | 0.51  | 3.15        | 0.03     | 1.65                           | Transport and binding | TIGR01844 typ | Porins                                                            |
| AhpC       | alkyl hydroperoxide reductase, C22 subun       | 52.02           | 4.83  | 17.6            | 5.68  | 2.96        | 0.11     | 1.56                           | Cellular processes:Ad | TIGR03137 per | Adaptations to atypical conditions                                |
| OmpA       | outer membrane protein A                       | 183.08          | 17.70 | 64.36           | 11.33 | 2.84        | 0.04     | 1.51                           | N/A                   | N/A           | N/A                                                               |
| PspA       | regulatory protein for phage-shock-prote       | 24.60           | 7.50  | 8.69            | 1.35  | 2.83        | 0.12     | 1.50                           | Cellular processes:Ad | TIGR02977 ph  | Adaptations to atypical conditions                                |
| DksA       | DNA-binding transcriptional regulator of r     | 9.46            | 2.95  | 3.64            | 0.5   | 2.60        | 0.12     | 1.38                           | Regulatory functions  | TIGR02420 RN  | Small molecule interactions                                       |
| RraA       | ribonuclease activity regulator protein Rra    | 11.43           | 3.35  | 4.47            | 1.23  | 2.56        | 0.16     | 1.35                           | Regulatory functions  | TIGR01935 Rra | Protein interactions                                              |
| GrpE       | heat shock protein                             | 7.43            | 0.50  | 3.07            | 1.26  | 2.42        | 0.17     | 1.28                           | N/A                   | N/A           | N/A                                                               |
| Pck        | phosphoenolpyruvate carboxykinase              | 21.24           | 5.81  | 8.96            | 1.26  | 2.37        | 0.09     | 1.25                           | Energy metabolism:    | TIGR00224 ph  | Glycolysis/gluconeogenesis                                        |
| CysN       | sulfate adenyltransferase subunit 1            | 26.17           | 8.14  | 12.04           | 1.3   | 2.17        | 0.11     | 1.12                           | Central intermediary  | TIGR00231 sm  | Sulfur metabolism                                                 |
| RplR       | 50S ribosomal protein L18                      | 5.47            | 2.88  | 2.52            | 0.85  | 2.17        | 0.39     | 1.12                           | Protein synthesis:Rib | TIGR00060 rib | Ribosomal proteins                                                |
| SelD       | selenophosphate synthetase                     | 7.25            | 3.95  | 3.35            | 0.8   | 2.16        | 0.35     | 1.11                           | N/A                   | TIGR00476 sel | N/A                                                               |
| FucU       | L-fucose mutarotase                            | 5.40            | 1.09  | 2.52            | 0.82  | 2.14        | 0.15     | 1.10                           | N/A                   | N/A           | N/A                                                               |
| SecB       | export protein SecB                            | 16.38           | 2.05  | 7.85            | 2.17  | 2.09        | 0.09     | 1.06                           | Protein fate:Protein  | TIGR00809 pro | Protein and peptide secretion and trafficking                     |
| AIIR       | DNA-binding transcriptional repressor          | 5.71            | 1.67  | 2.8             | 0.5   | 2.04        | 0.12     | 1.03                           | N/A                   | N/A           | N/A                                                               |
| YfgM       | hypothetical protein                           | 11.29           | 4.12  | 5.6             | 1     | 2.02        | 0.17     | 1.01                           | N/A                   | N/A           | N/A                                                               |
| CysD       | sulfate adenyltransferase subunit 2            | 7.34            | 1.76  | 3.64            | 0.5   | 2.02        | 0.08     | 1.01                           | Central intermediary  | TIGR02039 sul | Sulfur metabolism                                                 |
| SdhB       | succinate dehydrogenase, FeS subunit           | 18.23           | 2.67  | 9.25            | 0.92  | 1.97        | 0.03     | 0.98                           | Energy metabolism:    | TIGR00384 suc | TCA cycle                                                         |
| Gst        | glutathionine S-transferase                    | 22.87           | 5.54  | 11.76           | 0.14  | 1.94        | 0.06     | 0.96                           | N/A                   | N/A           | N/A                                                               |
| UspA       | universal stress global response regulator     | 43.04           | 14.24 | 22.4            | 1.13  | 1.92        | 0.11     | 0.94                           | N/A                   | N/A           | N/A                                                               |
| HflC       | modulator for HflB protease specific for p     | 16.14           | 2.16  | 8.41            | 1.53  | 1.92        | 0.05     | 0.94                           | Regulatory functions  | TIGR01932 Hfl | Protein interactions                                              |
| Ssb        | single-strand DNA-binding protein              | 5.31            | 1.15  | 2.8             | 0.5   | 1.90        | 0.08     | 0.92                           | DNA metabolism:DN     | TIGR00621 sin | DNA replication, recombination, and repair                        |
| YiiU       | hypothetical protein                           | 7.38            | 0.75  | 3.91            | 0.92  | 1.89        | 0.07     | 0.92                           | N/A                   | N/A           | N/A                                                               |
| ZapA       | protein that localizes to the cytokinetic rin  | 5.77            | 1.83  | 3.09            | 0.52  | 1.87        | 0.13     | 0.90                           | N/A                   | N/A           | N/A                                                               |
| ManZ       | PTS enzyme IID, mannose-specific               | 6.27            | 2.43  | 3.36            | 0.84  | 1.87        | 0.21     | 0.90                           | Signal transduction:  | TIGR00828 PTS | PTS                                                               |
| GigA       | glycogen synthase                              | 9.38            | 2.38  | 5.04            | 2.25  | 1.86        | 0.26     | 0.90                           | Energy metabolism:    | TIGR02095 gly | Biosynthesis and degradation of polysaccharides                   |
| b2253      | #N/A                                           | 15.66           | 0.46  | 8.42            | 1.77  | 1.86        | 0.05     | 0.89                           | #N/A                  | #N/A          | N/A                                                               |
| PntB       | pyridine nucleotide transhydrogenase           | 10.74           | 1.12  | 5.87            | 1.38  | 1.83        | 0.07     | 0.87                           | N/A                   | N/A           | N/A                                                               |
| MinD       | membrane ATPase of the MinC-MinD-Min           | 22.34           | 3.22  | 12.32           | 0.46  | 1.81        | 0.02     | 0.86                           | Cellular processes:Ce | TIGR01968 sep | Cell division                                                     |
| YaeP       | hypothetical protein                           | 7.10            | 2.33  | 3.93            | 0.53  | 1.81        | 0.13     | 0.85                           | N/A                   | N/A           | N/A                                                               |
| TpiA       | triosephosphate isomerase                      | 10.12           | 4.16  | 5.61            | 1.34  | 1.80        | 0.23     | 0.85                           | Energy metabolism:    | TIGR00419 tri | Glycolysis/gluconeogenesis                                        |
| MinE       | cell division topological specificity factor M | 5.40            | 1.09  | 3.07            | 1.26  | 1.76        | 0.21     | 0.81                           | Cellular processes:Ce | TIGR01215 cel | Cell division                                                     |
| YiaD       | predicted outer membrane lipoprotein           | 5.88            | 3.01  | 3.35            | 1.64  | 1.76        | 0.50     | 0.81                           | N/A                   | N/A           | N/A                                                               |
| PhoP       | DNA-binding response regulator in two-co       | 12.00           | 3.12  | 7               | 1.75  | 1.71        | 0.13     | 0.78                           | N/A                   | N/A           | N/A                                                               |
| SucD       | succinyl-CoA synthetase subunit alpha          | 31.89           | 5.92  | 18.77           | 1.19  | 1.70        | 0.04     | 0.76                           | Energy metabolism:    | TIGR01019 suc | TCA cycle                                                         |
| CysM       | cysteine synthase B (O-acetylserine sulfhy     | 6.18            | 1.13  | 3.64            | 0.5   | 1.70        | 0.05     | 0.76                           | Amino acid biosynth   | TIGR01136 cys | Serine family                                                     |
| YhcB       | orf, hypothetical protein                      | 20.72           | 4.16  | 12.32           | 1.9   | 1.68        | 0.06     | 0.75                           | N/A                   | N/A           | N/A                                                               |
| SurA       | peptidyl-prolyl cis-trans isomerase (PPlase    | 14.55           | 3.54  | 8.68            | 0.53  | 1.68        | 0.06     | 0.75                           | N/A                   | N/A           | N/A                                                               |
| ToIB       | translocation protein TolB precursor           | 11.68           | 3.71  | 7               | 0.95  | 1.67        | 0.12     | 0.74                           | Cellular processes:Pa | TIGR02800 Tol | Pathogenesis                                                      |
| YbiC       | predicted dehydrogenase                        | 7.47            | 2.59  | 4.48            | 1.29  | 1.67        | 0.20     | 0.74                           | N/A                   | N/A           | N/A                                                               |
| HflK       | modulator for HflB protease specific for p     | 13.03           | 3.84  | 7.84            | 0.55  | 1.66        | 0.09     | 0.73                           | N/A                   | TIGR01933 Hfl | N/A                                                               |
| Ihfb       | integration host factor subunit beta           | 11.19           | 2.73  | 6.73            | 1.49  | 1.66        | 0.11     | 0.73                           | DNA metabolism:DN     | TIGR00988 int | DNA replication, recombination, and repair                        |
| MraW       | S-adenosyl-methyltransferase                   | 11.61           | 3.04  | 7               | 1.32  | 1.66        | 0.10     | 0.73                           | Cell envelope: Biosyn | TIGR00006 S-a | Biosynthesis and degradation of murein sacculus and peptidoglycan |
| YfgL       | protein assembly complex, lipoprotein cor      | 10.80           | 3.38  | 6.73            | 5.15  | 1.60        | 0.68     | 0.68                           | Protein fate:Protein  | TIGR03300 out | Protein and peptide secretion and trafficking                     |
| FabI       | enoyl-(acyl carrier protein) reductase         | 25.11           | 2.61  | 15.67           | 1.95  | 1.60        | 0.03     | 0.68                           | N/A                   | N/A           | N/A                                                               |
| FabD       | acyl carrier protein S-malonyltransferase      | 8.97            | 2.04  | 5.6             | 1     | 1.60        | 0.08     | 0.68                           | Fatty acid and phosph | TIGR00128 ma  | Biosynthesis                                                      |
| MscS       | mechanosensitive channel                       | 9.87            | 0.98  | 6.18            | 1.82  | 1.60        | 0.10     | 0.68                           | N/A                   | N/A           | N/A                                                               |
| TktA       | transketolase 1, thiamin-binding               | 54.84           | 2.05  | 34.47           | 2.9   | 1.59        | 0.01     | 0.67                           | Energy metabolism:    | TIGR00232 tra | Pentose phosphate pathway                                         |
| Crp        | DNA-binding transcriptional dual regulato      | 14.22           | 4.32  | 8.97            | 1.04  | 1.58        | 0.11     | 0.66                           | N/A                   | N/A           | N/A                                                               |
| PepB       | putative peptidase                             | 18.99           | 1.34  | 12.04           | 0.89  | 1.58        | 0.01     | 0.66                           | N/A                   | N/A           | N/A                                                               |
| RplL       | 50S ribosomal protein L7/L12                   | 53.28           | 8.55  | 33.87           | 3.13  | 1.57        | 0.03     | 0.65                           | Protein synthesis:Rib | TIGR00855 rib | Ribosomal proteins                                                |
| CspC       | stress protein, member of the CspA-family      | 11.46           | 2.07  | 7.29            | 1.36  | 1.57        | 0.07     | 0.65                           | N/A                   | N/A           | N/A                                                               |
| YfgA       | hypothetical protein                           | 6.14            | 0.84  | 3.92            | 0.47  | 1.57        | 0.03     | 0.65                           | N/A                   | N/A           | N/A                                                               |

|      |                                                                    |        |       |       |      |      |      |      |                                          |           |      |                                               |
|------|--------------------------------------------------------------------|--------|-------|-------|------|------|------|------|------------------------------------------|-----------|------|-----------------------------------------------|
| YaeT | hypothetical protein                                               | 13.11  | 1.76  | 8.41  | 1.49 | 1.56 | 0.05 | 0.64 | Protein fate:Protein                     | TIGR03303 | out  | Protein and peptide secretion and trafficking |
| YbiS | hypothetical protein                                               | 8.29   | 3.79  | 5.33  | 1.33 | 1.55 | 0.27 | 0.64 | N/A                                      | N/A       | N/A  | N/A                                           |
| LacI | transcriptional repressor of the lac operon                        | 38.62  | 7.59  | 25.23 | 3.19 | 1.53 | 0.05 | 0.61 | N/A                                      | N/A       | N/A  | N/A                                           |
| SdhA | succinate dehydrogenase flavoprotein subunit                       | 36.03  | 6.02  | 23.8  | 0.83 | 1.51 | 0.03 | 0.60 | Energy metabolism:                       | TIGR01812 | suc  | TCA cycle                                     |
| TalB | transaldolase B                                                    | 38.60  | 2.36  | 25.51 | 3.45 | 1.51 | 0.02 | 0.60 | Energy metabolism:                       | TIGR00874 | tra  | Pentose phosphate pathway                     |
| BasR | DNA-binding response regulator in two-component system             | 4.99   | 1.52  | 3.37  | 0.87 | 1.48 | 0.16 | 0.57 | N/A                                      | N/A       | N/A  | N/A                                           |
| Lrp  | DNA-binding transcriptional dual regulator                         | 7.45   | 2.29  | 5.03  | 1.42 | 1.48 | 0.17 | 0.57 | N/A                                      | N/A       | N/A  | N/A                                           |
| UbiE | ubiquinone/menaquinone biosynthesis maturation factor              | 5.40   | 1.09  | 3.65  | 0.51 | 1.48 | 0.06 | 0.57 | Biosynthesis of cofactors:               | TIGR01934 | ubi  | Menaquinone and ubiquinone                    |
| IscU | scaffold protein                                                   | 8.67   | 0.59  | 5.87  | 1.62 | 1.48 | 0.08 | 0.56 | Biosynthesis of cofactors:               | TIGR01999 | FeS  | Other                                         |
| NlpA | cytoplasmic membrane lipoprotein-28                                | 6.18   | 1.13  | 4.19  | 2.19 | 1.47 | 0.31 | 0.56 | Cell envelope:Other                      | TIGR00363 | lip  | Other                                         |
| CysH | phosphoadenosine phosphosulfate reductase                          | 23.96  | 2.38  | 16.26 | 1.45 | 1.47 | 0.02 | 0.56 | Central intermediary metabolism:         | TIGR00434 | ph   | Sulfur metabolism                             |
| Icd  | isocitrate dehydrogenase                                           | 117.18 | 3.60  | 79.82 | 1.42 | 1.47 | 0.00 | 0.55 | Energy metabolism:                       | TIGR00183 | iso  | TCA cycle                                     |
| HemX | predicted uroporphyrinogen III methylase                           | 9.04   | 1.70  | 6.17  | 1.04 | 1.47 | 0.06 | 0.55 | N/A                                      | N/A       | N/A  | N/A                                           |
| CyoA | cytochrome o ubiquinol oxidase subunit II                          | 10.24  | 1.23  | 6.99  | 1.2  | 1.46 | 0.04 | 0.55 | Energy metabolism:                       | TIGR01433 | ubi  | Electron transport                            |
| YhbS | predicted acyltransferase with acyl-CoA N-acyltransferase activity | 5.33   | 1.66  | 3.64  | 0.44 | 1.46 | 0.11 | 0.55 | N/A                                      | N/A       | N/A  | N/A                                           |
| InfA | translation initiation factor IF-1                                 | 5.31   | 1.15  | 3.65  | 0.51 | 1.45 | 0.07 | 0.54 | Protein synthesis:Translation factors    | TIGR00008 | tra  | Translation factors                           |
| YigF | orf, hypothetical protein                                          | 6.49   | 2.20  | 4.49  | 1.01 | 1.45 | 0.17 | 0.53 | Transcription:Degradation of RNA         | TIGR00004 | pu   | Degradation of RNA                            |
| AtpG | FOF1 ATP synthase subunit gamma                                    | 16.60  | 3.05  | 11.49 | 1.03 | 1.44 | 0.04 | 0.53 | Energy metabolism:                       | TIGR01146 | ATP  | ATP-proton motive force interconversion       |
| RplK | 50S ribosomal protein L11                                          | 12.85  | 3.10  | 8.96  | 0.46 | 1.43 | 0.06 | 0.52 | Protein synthesis:Ribosomal proteins     | TIGR01632 | rib  | Ribosomal proteins                            |
| IspG | 4-hydroxy-3-methylbut-2-en-1-yl diphosphate lyase                  | 12.72  | 1.09  | 8.96  | 0.46 | 1.42 | 0.01 | 0.51 | Biosynthesis of cofactors:               | TIGR00612 | 4-h  | Other                                         |
| SucA | alpha-ketoglutarate decarboxylase                                  | 53.90  | 10.07 | 38.07 | 1.67 | 1.42 | 0.04 | 0.50 | Energy metabolism:                       | TIGR00239 | oxd  | TCA cycle                                     |
| YcfF | orf, hypothetical protein                                          | 6.67   | 2.33  | 4.75  | 1.24 | 1.40 | 0.19 | 0.49 | N/A                                      | N/A       | N/A  | N/A                                           |
| UspE | stress-induced protein                                             | 22.79  | 3.48  | 16.25 | 2.13 | 1.40 | 0.04 | 0.49 | N/A                                      | N/A       | N/A  | N/A                                           |
| MetH | B12-dependent methionine synthase                                  | 30.17  | 7.27  | 21.57 | 3    | 1.40 | 0.08 | 0.48 | Amino acid biosynthesis:Aspartate family | TIGR02082 | me   | Aspartate family                              |
| InfC | translation initiation factor IF-3                                 | 26.92  | 6.04  | 19.32 | 2.97 | 1.39 | 0.07 | 0.48 | Protein synthesis:Translation factors    | TIGR00168 | tra  | Translation factors                           |
| TyrS | tyrosyl-tRNA synthetase                                            | 23.37  | 7.15  | 16.77 | 4.51 | 1.39 | 0.17 | 0.48 | Protein synthesis:tRNA aminoacylation    | TIGR00234 | tyr  | tRNA aminoacylation                           |
| CysI | sulfite reductase, beta subunit, NAD(P)-binding                    | 43.71  | 1.68  | 31.38 | 5.81 | 1.39 | 0.04 | 0.48 | Central intermediary metabolism:         | TIGR02041 | sul  | Sulfur metabolism                             |
| Pgm  | phosphoglucomutase                                                 | 19.49  | 4.87  | 14.01 | 1.08 | 1.39 | 0.07 | 0.48 | Energy metabolism:                       | TIGR01132 | ph   | Sugars                                        |
| DapA | dihydrodipicolinate synthase                                       | 12.46  | 3.17  | 8.96  | 1.01 | 1.39 | 0.08 | 0.48 | Amino acid biosynthesis:Aspartate family | TIGR00674 | dih  | Aspartate family                              |
| FumA | fumarate hydratase (fumarase A), aerobic                           | 21.64  | 6.88  | 15.7  | 2.27 | 1.38 | 0.12 | 0.46 | N/A                                      | TIGR00722 | hyd  | N/A                                           |
| AspC | aspartate aminotransferase, PLP-dependent                          | 64.81  | 5.49  | 47.06 | 2.55 | 1.38 | 0.01 | 0.46 | N/A                                      | N/A       | N/A  | N/A                                           |
| ManX | fused mannose-specific PTS enzymes: IIA C                          | 17.31  | 1.02  | 12.63 | 3.16 | 1.37 | 0.07 | 0.45 | Signal transduction:PTS                  | TIGR00824 | PTS  | PTS                                           |
| NlpB | lipoprotein-34                                                     | 9.94   | 1.80  | 7.28  | 2.11 | 1.37 | 0.12 | 0.45 | N/A                                      | N/A       | N/A  | N/A                                           |
| SucB | dihydrodipicolinate acetyltransferase                              | 48.15  | 2.74  | 35.27 | 3.03 | 1.37 | 0.01 | 0.45 | Energy metabolism:                       | TIGR01347 | dih  | TCA cycle                                     |
| RpsF | 30S ribosomal protein S6                                           | 15.99  | 3.79  | 11.76 | 1.38 | 1.36 | 0.07 | 0.44 | Protein synthesis:Ribosomal proteins     | TIGR00166 | rib  | Ribosomal proteins                            |
| Ftn  | ferritin iron storage protein (cytoplasmic)                        | 9.87   | 2.26  | 7.27  | 1.21 | 1.36 | 0.08 | 0.44 | N/A                                      | N/A       | N/A  | N/A                                           |
| SucC | succinyl-CoA synthetase subunit beta                               | 59.71  | 10.49 | 43.99 | 3.82 | 1.36 | 0.04 | 0.44 | Energy metabolism:                       | TIGR01016 | suc  | TCA cycle                                     |
| ThrS | threonyl-tRNA synthetase                                           | 25.05  | 1.52  | 18.46 | 2.86 | 1.36 | 0.03 | 0.44 | Protein synthesis:tRNA aminoacylation    | TIGR00418 | thr  | tRNA aminoacylation                           |
| YdgA | hypothetical protein                                               | 5.31   | 1.15  | 3.92  | 0.47 | 1.35 | 0.06 | 0.44 | N/A                                      | N/A       | N/A  | N/A                                           |
| AcnB | aconitate hydratase                                                | 48.57  | 1.32  | 36.12 | 0.47 | 1.34 | 0.00 | 0.43 | Energy metabolism:                       | TIGR00117 | acd  | TCA cycle                                     |
| FabG | 3-oxoacyl-[acyl-carrier-protein] reductase                         | 18.45  | 2.41  | 13.74 | 2.26 | 1.34 | 0.04 | 0.43 | Fatty acid and phospholipid metabolism:  | TIGR01830 | 3-ox | Biosynthesis                                  |
| PntA | NAD(P) transhydrogenase subunit alpha                              | 29.37  | 7.78  | 21.87 | 3.15 | 1.34 | 0.09 | 0.43 | Energy metabolism:                       | TIGR00561 | NA   | Electron transport                            |
| Tpx  | thiol peroxidase                                                   | 26.05  | 2.78  | 19.62 | 1.96 | 1.33 | 0.02 | 0.41 | N/A                                      | N/A       | N/A  | N/A                                           |
| SerA | D-3-phosphoglycerate dehydrogenase                                 | 40.45  | 3.11  | 30.52 | 0.92 | 1.33 | 0.01 | 0.41 | N/A                                      | N/A       | N/A  | N/A                                           |
| YadR | hypothetical protein                                               | 8.13   | 2.45  | 6.15  | 1.21 | 1.32 | 0.13 | 0.40 | Biosynthesis of cofactors:               | TIGR00049 | iro  | Other                                         |
| SodB | superoxide dismutase, Fe                                           | 19.25  | 3.05  | 14.56 | 2.38 | 1.32 | 0.05 | 0.40 | N/A                                      | N/A       | N/A  | N/A                                           |
| Asd  | aspartate-semialdehyde dehydrogenase                               | 42.93  | 3.24  | 32.5  | 4.05 | 1.32 | 0.02 | 0.40 | Amino acid biosynthesis:Aspartate family | TIGR01745 | asp  | Aspartate family                              |
| PpiD | peptidyl-prolyl cis-trans isomerase (rotamase)                     | 18.51  | 1.96  | 14.02 | 3.08 | 1.32 | 0.06 | 0.40 | N/A                                      | N/A       | N/A  | N/A                                           |
| PdxJ | pyridoxal phosphate biosynthetic protein                           | 8.26   | 0.99  | 6.44  | 0.47 | 1.28 | 0.02 | 0.36 | Biosynthesis of cofactors:               | TIGR00559 | pyr  | Pyridoxine                                    |
| Pnp  | polynucleotide phosphorylase/polyadenylate phosphorylase           | 32.96  | 2.14  | 25.75 | 2.1  | 1.28 | 0.01 | 0.36 | Transcription:Degradation of RNA         | TIGR03591 | pol  | Degradation of RNA                            |
| SseA | putative thiosulfate sulfurtransferase                             | 5.70   | 1.54  | 4.48  | 0.94 | 1.27 | 0.12 | 0.35 | N/A                                      | N/A       | N/A  | N/A                                           |
| FkpA | FKBP-type peptidyl-prolyl cis-trans isomerase                      | 10.61  | 2.30  | 8.4   | 0.75 | 1.26 | 0.05 | 0.34 | N/A                                      | N/A       | N/A  | N/A                                           |
| KatG | catalase/hydroperoxidase HPI(I)                                    | 26.73  | 1.15  | 21.3  | 1.99 | 1.26 | 0.01 | 0.33 | Cellular processes:Detoxification        | TIGR00198 | cat  | Detoxification                                |
| TrxB | thioredoxin reductase, FAD/NAD(P)-binding                          | 25.63  | 4.26  | 20.46 | 2.8  | 1.25 | 0.05 | 0.32 | Energy metabolism:                       | TIGR01292 | thi  | Electron transport                            |
| HtpG | heat shock protein 90                                              | 23.78  | 2.24  | 19.04 | 1.88 | 1.25 | 0.02 | 0.32 | N/A                                      | N/A       | N/A  | N/A                                           |
| HlpA | periplasmic chaperone                                              | 11.17  | 1.61  | 8.95  | 1.63 | 1.25 | 0.05 | 0.32 | N/A                                      | N/A       | N/A  | N/A                                           |
| Mdh  | malate dehydrogenase                                               | 76.14  | 6.03  | 61.03 | 7.51 | 1.25 | 0.02 | 0.32 | Energy metabolism:                       | TIGR01772 | ma   | TCA cycle                                     |
| Hns  | global DNA-binding transcriptional dual regulator                  | 42.58  | 5.25  | 34.15 | 7.64 | 1.25 | 0.07 | 0.32 | N/A                                      | N/A       | N/A  | N/A                                           |
| GdhA | glutamate dehydrogenase                                            | 34.40  | 5.40  | 27.71 | 2.21 | 1.24 | 0.03 | 0.31 | N/A                                      | N/A       | N/A  | N/A                                           |
| AtpD | FOF1 ATP synthase subunit beta                                     | 90.98  | 1.67  | 73.37 | 4.12 | 1.24 | 0.00 | 0.31 | Energy metabolism:                       | TIGR01039 | ATP  | ATP-proton motive force interconversion       |
| InfB | translation initiation factor IF-2                                 | 45.38  | 10.25 | 36.97 | 3.04 | 1.23 | 0.06 | 0.30 | Protein synthesis:Translation factors    | TIGR00231 | sm   | Translation factors                           |
| Ais  | hypothetical protein                                               | 8.60   | 1.66  | 7.01  | 0.54 | 1.23 | 0.04 | 0.29 | N/A                                      | N/A       | N/A  | N/A                                           |

|      |                                                        |        |       |        |      |      |      |      |                             |                |                                                                                 |
|------|--------------------------------------------------------|--------|-------|--------|------|------|------|------|-----------------------------|----------------|---------------------------------------------------------------------------------|
| FbaA | fructose-bisphosphate aldolase                         | 31.85  | 5.19  | 26.04  | 0.62 | 1.22 | 0.03 | 0.29 | Energy metabolism:          | TIGR00167 ket  | Glycolysis/gluconeogenesis                                                      |
| SlyD | FKBP-type peptidyl prolyl cis-trans isomerase          | 9.93   | 1.55  | 8.13   | 2.18 | 1.22 | 0.10 | 0.29 | N/A                         | N/A            | N/A                                                                             |
| HupA | HU, DNA-binding transcriptional regulator              | 38.61  | 11.00 | 31.66  | 3.3  | 1.22 | 0.09 | 0.29 | N/A                         | N/A            | N/A                                                                             |
| DeoD | purine nucleoside phosphorylase                        | 9.83   | 1.61  | 8.11   | 2.04 | 1.21 | 0.09 | 0.28 | Purines, pyrimidines        | TIGR00107 pur  | Salvage of nucleosides and nucleotides                                          |
| RplA | 50S ribosomal protein L1                               | 27.06  | 7.69  | 22.41  | 1.1  | 1.21 | 0.08 | 0.27 | Protein synthesis:Rib       | TIGR01169 rib  | Ribosomal proteins                                                              |
| Rne  | fused ribonucleaseE: endoribonuclease/RNase            | 15.57  | 2.72  | 12.9   | 1.9  | 1.21 | 0.05 | 0.27 | Transcription:Degrad        | TIGR00757 rib  | Degradation of RNA                                                              |
| GrxC | glutaredoxin 3                                         | 6.07   | 3.05  | 5.04   | 0.78 | 1.20 | 0.28 | 0.27 | Energy metabolism:          | TIGR02181 glu  | Electron transport                                                              |
| TrpB | tryptophan synthase subunit beta                       | 18.90  | 1.76  | 15.7   | 2.27 | 1.20 | 0.03 | 0.27 | Amino acid biosynth         | TIGR00263 try  | Aromatic amino acid family                                                      |
| Lpd  | dihydrolipoamide dehydrogenase                         | 79.88  | 19.65 | 66.4   | 3.68 | 1.20 | 0.06 | 0.27 | N/A                         | TIGR01350 diH  | N/A                                                                             |
| LuxS | S-ribosylhomocysteinease                               | 8.71   | 2.64  | 7.27   | 1.66 | 1.20 | 0.14 | 0.26 | N/A                         | N/A            | N/A                                                                             |
| CysK | cysteine synthase A, O-acetylserine sulfhydrylase      | 139.00 | 6.14  | 116.49 | 1.86 | 1.19 | 0.00 | 0.25 | Amino acid biosynth         | TIGR01136 cys  | Serine family                                                                   |
| LpcA | phosphoheptose isomerase                               | 7.34   | 1.76  | 6.16   | 1.3  | 1.19 | 0.10 | 0.25 | Cell envelope:BioSyn        | TIGR00441 ph   | Biosynthesis and degradation of surface polysaccharides and lipopolysaccharides |
| AcrA | multidrug efflux system                                | 10.67  | 1.46  | 8.96   | 0.86 | 1.19 | 0.03 | 0.25 | Transport and binding       | TIGR01730 eff  | Unknown substrate                                                               |
| SspA | stringent starvation protein A                         | 14.60  | 4.64  | 12.33  | 0.63 | 1.18 | 0.10 | 0.24 | N/A                         | N/A            | N/A                                                                             |
| YajQ | orf, hypothetical protein                              | 10.60  | 2.44  | 8.96   | 1.29 | 1.18 | 0.07 | 0.24 | N/A                         | N/A            | N/A                                                                             |
| LivJ | leucine/isoleucine/valine transporter subunit          | 14.22  | 4.32  | 12.04  | 1.7  | 1.18 | 0.11 | 0.24 | N/A                         | N/A            | N/A                                                                             |
| YcgK | hypothetical protein                                   | 8.26   | 0.99  | 7.01   | 0.54 | 1.18 | 0.02 | 0.24 | N/A                         | N/A            | N/A                                                                             |
| GpmA | phosphoglyceromutase                                   | 42.04  | 2.25  | 35.88  | 4.68 | 1.17 | 0.02 | 0.23 | N/A                         | TIGR01258 ph   | N/A                                                                             |
| TyrB | tyrosine aminotransferase, tyrosine-repressible        | 17.71  | 1.67  | 15.13  | 1.01 | 1.17 | 0.01 | 0.23 | N/A                         | N/A            | N/A                                                                             |
| ProA | gamma-glutamyl phosphate reductase                     | 8.19   | 1.56  | 7.01   | 1.34 | 1.17 | 0.07 | 0.22 | Amino acid biosynth         | TIGR00407 glu  | Glutamate family                                                                |
| SerC | phosphoserine aminotransferase                         | 39.77  | 3.62  | 34.18  | 6.31 | 1.16 | 0.04 | 0.22 | Amino acid biosynth         | TIGR01364 ph   | Serine family                                                                   |
| PurC | phosphoribosylaminoimidazole-succinocoadic acid        | 13.98  | 0.68  | 12.05  | 1.38 | 1.16 | 0.02 | 0.21 | Purines, pyrimidines        | TIGR00081 ph   | Purine ribonucleotide biosynthesis                                              |
| Fdx  | [2Fe-2S] ferredoxin                                    | 6.14   | 0.84  | 5.31   | 1.21 | 1.16 | 0.07 | 0.21 | Biosynthesis of cofactors   | TIGR02007 fer  | Other                                                                           |
| LysC | aspartate kinase III                                   | 35.91  | 8.12  | 31.1   | 1.19 | 1.15 | 0.05 | 0.21 | Amino acid biosynth         | TIGR00656 asp  | Aspartate family                                                                |
| UdhA | putative oxidoreductase                                | 11.93  | 2.37  | 10.35  | 1.71 | 1.15 | 0.07 | 0.20 | N/A                         | N/A            | N/A                                                                             |
| MetK | S-adenosylmethionine synthetase                        | 26.71  | 5.43  | 23.27  | 3.65 | 1.15 | 0.07 | 0.20 | Central intermediary        | TIGR01034 me   | Other                                                                           |
| Pps  | phosphoenolpyruvate synthase                           | 23.44  | 2.46  | 20.43  | 1.88 | 1.15 | 0.02 | 0.20 | Energy metabolism:          | TIGR01418 ph   | Glycolysis/gluconeogenesis                                                      |
| YidC | inner membrane protein translocase component           | 8.67   | 0.59  | 7.56   | 0.76 | 1.15 | 0.01 | 0.20 | Protein fate:Protein        | TIGR03592 me   | Protein and peptide secretion and trafficking                                   |
| PykF | pyruvate kinase                                        | 21.50  | 2.17  | 18.77  | 1.44 | 1.15 | 0.02 | 0.20 | Energy metabolism:          | TIGR01064 pyr  | Glycolysis/gluconeogenesis                                                      |
| AckA | acetate kinase                                         | 15.90  | 5.08  | 14     | 1.29 | 1.14 | 0.11 | 0.18 | Energy metabolism:          | TIGR00016 ac   | Fermentation                                                                    |
| PfFB | pyruvate formate lyase I                               | 17.75  | 1.26  | 15.67  | 1.95 | 1.13 | 0.02 | 0.18 | Energy metabolism:          | TIGR01255 for  | Fermentation                                                                    |
| TrpD | bifunctional indole-3-glycerol-phosphate synthase      | 18.10  | 2.01  | 15.98  | 3.14 | 1.13 | 0.05 | 0.18 | Amino acid biosynth         | TIGR00566 glu  | Aromatic amino acid family                                                      |
| Tdh  | L-threonine 3-dehydrogenase                            | 5.40   | 1.09  | 4.77   | 1.8  | 1.13 | 0.18 | 0.18 | Energy metabolism:          | TIGR00692 L-th | Amino acids and amines                                                          |
| FtsH | protease, ATP-dependent zinc-metalloprotease           | 27.34  | 4.01  | 24.38  | 3.81 | 1.12 | 0.05 | 0.17 | Protein fate:Degrad         | TIGR01241 AT   | Degradation of proteins, peptides, and glycopeptides                            |
| PurR | DNA-binding transcriptional repressor, hypoxanthine    | 5.66   | 2.60  | 5.06   | 1.73 | 1.12 | 0.33 | 0.16 | N/A                         | N/A            | N/A                                                                             |
| HslU | ATP-dependent protease ATP-binding subunit             | 15.34  | 2.85  | 13.72  | 0.89 | 1.12 | 0.04 | 0.16 | Protein fate:Protein        | TIGR00390 AT   | Protein folding and stabilization                                               |
| AsnS | asparaginyl-tRNA synthetase                            | 26.86  | 2.41  | 24.08  | 0.68 | 1.12 | 0.01 | 0.16 | Protein synthesis:Tr        | TIGR00457 asp  | tRNA aminoacylation                                                             |
| AtpA | FOF1 ATP synthase subunit alpha                        | 89.32  | 10.60 | 80.63  | 6.3  | 1.11 | 0.02 | 0.15 | Energy metabolism:          | TIGR00962 AT   | ATP-proton motive force interconversion                                         |
| FabH | 3-oxoacyl-(acyl carrier protein) synthase              | 9.93   | 2.37  | 8.97   | 1.38 | 1.11 | 0.08 | 0.15 | Fatty acid and phospholipid | TIGR00747 3-ox | Biosynthesis                                                                    |
| GlmS | D-fructose-6-phosphate amidotransferase                | 17.65  | 1.98  | 15.96  | 0.67 | 1.11 | 0.01 | 0.15 | Central intermediary        | TIGR01135 glu  | Amino sugars                                                                    |
| HscA | chaperone protein HscA                                 | 10.81  | 3.66  | 9.8    | 1.26 | 1.10 | 0.13 | 0.14 | Protein fate:Protein        | TIGR01991 Fe   | Protein folding and stabilization                                               |
| RpsB | 30S ribosomal protein S2                               | 24.62  | 3.03  | 22.39  | 2.14 | 1.10 | 0.02 | 0.14 | Protein synthesis:Rib       | TIGR01011 rib  | Ribosomal proteins                                                              |
| YdhD | hypothetical protein                                   | 8.32   | 2.02  | 7.57   | 0.91 | 1.10 | 0.07 | 0.14 | Energy metabolism:          | TIGR00365 mo   | Electron transport                                                              |
| MaeB | malic enzyme                                           | 8.30   | 2.16  | 7.57   | 1.49 | 1.10 | 0.11 | 0.13 | N/A                         | N/A            | N/A                                                                             |
| Crr  | glucose-specific PTS system enzyme IIA component       | 28.82  | 0.63  | 26.3   | 3.19 | 1.10 | 0.02 | 0.13 | Signal transduction:        | TIGR00830 PTS  | PTS                                                                             |
| TrpC | N-(5-phosphoribosyl)anthranilate isomerase             | 16.25  | 4.92  | 14.85  | 0.66 | 1.09 | 0.09 | 0.13 | N/A                         | N/A            | N/A                                                                             |
| RpsI | 30S ribosomal protein S9                               | 6.10   | 1.84  | 5.61   | 1.79 | 1.09 | 0.19 | 0.12 | N/A                         | N/A            | N/A                                                                             |
| Gnd  | 6-phosphogluconate dehydrogenase                       | 34.09  | 2.83  | 31.35  | 1.56 | 1.09 | 0.01 | 0.12 | Energy metabolism:          | TIGR00873 6-ph | Pentose phosphate pathway                                                       |
| TrpA | tryptophan synthase subunit alpha                      | 27.42  | 3.77  | 25.24  | 6.24 | 1.09 | 0.08 | 0.12 | Amino acid biosynth         | TIGR00262 try  | Aromatic amino acid family                                                      |
| Pgk  | phosphoglycerate kinase                                | 79.94  | 2.24  | 73.69  | 4.36 | 1.08 | 0.00 | 0.12 | N/A                         | N/A            | N/A                                                                             |
| Dps  | DNA protection during starvation condition             | 6.99   | 0.34  | 6.45   | 1.03 | 1.08 | 0.03 | 0.12 | N/A                         | N/A            | N/A                                                                             |
| MetQ | DL-methionine transporter subunit                      | 34.90  | 7.79  | 32.51  | 2.31 | 1.07 | 0.05 | 0.10 | Cell envelope:Other         | TIGR00363 lip  | Other                                                                           |
| ArcA | DNA-binding response regulator in two-component system | 10.79  | 2.18  | 10.07  | 0.73 | 1.07 | 0.05 | 0.10 | N/A                         | N/A            | N/A                                                                             |
| YfbG | hypothetical protein                                   | 15.27  | 1.13  | 14.28  | 3.04 | 1.07 | 0.05 | 0.10 | N/A                         | N/A            | N/A                                                                             |
| SohB | predicted inner membrane peptidase                     | 6.58   | 0.44  | 6.16   | 0.54 | 1.07 | 0.01 | 0.10 | N/A                         | N/A            | N/A                                                                             |
| SecD | protein export protein SecD                            | 12.28  | 3.33  | 11.49  | 1.82 | 1.07 | 0.10 | 0.10 | Protein fate:Protein        | TIGR00916 pro  | Protein and peptide secretion and trafficking                                   |
| RpsE | 30S ribosomal protein S5                               | 18.83  | 7.92  | 17.64  | 0.9  | 1.07 | 0.18 | 0.09 | Protein synthesis:Rib       | TIGR01021 rib  | Ribosomal proteins                                                              |
| UspG | universal stress protein UP12                          | 12.28  | 1.67  | 11.5   | 4.7  | 1.07 | 0.19 | 0.09 | N/A                         | N/A            | N/A                                                                             |
| CysJ | sulfite reductase, alpha subunit, flavoprotein         | 36.48  | 6.51  | 34.17  | 3.31 | 1.07 | 0.04 | 0.09 | N/A                         | TIGR01931 sul  | N/A                                                                             |
| HisF | imidazole glycerol phosphate synthase subunit          | 14.60  | 4.64  | 13.72  | 1.31 | 1.06 | 0.11 | 0.09 | Amino acid biosynth         | TIGR00735 im   | Histidine family                                                                |
| PepQ | proline dipeptidase                                    | 12.20  | 3.67  | 11.49  | 2.49 | 1.06 | 0.14 | 0.09 | N/A                         | N/A            | N/A                                                                             |
| TufA | protein chain elongation factor EF-Tu (diphosphate)    | 448.63 | 29.39 | 422.86 | 4.91 | 1.06 | 0.00 | 0.09 | Protein synthesis:Tr        | TIGR00231 sm   | Translation factors                                                             |

|      |                                               |        |       |        |      |      |      |       |                       |           |     |                                                                                 |
|------|-----------------------------------------------|--------|-------|--------|------|------|------|-------|-----------------------|-----------|-----|---------------------------------------------------------------------------------|
| RibE | riboflavin synthase subunit beta              | 15.64  | 0.87  | 14.84  | 1.18 | 1.05 | 0.01 | 0.08  | Biosynthesis of cofad | TIGR00114 | 6,7 | Riboflavin, FMN, and FAD                                                        |
| GalU | glucose-1-phosphate uridylyltransferase       | 7.38   | 0.75  | 7      | 0.52 | 1.05 | 0.02 | 0.08  | Cell envelope:Bio     | TIGR01099 | UT  | Biosynthesis and degradation of surface polysaccharides and lipopolysaccharides |
| Pta  | phosphate acetyltransferase                   | 37.66  | 4.98  | 35.86  | 2.62 | 1.05 | 0.02 | 0.07  | Energy metabolism:    | TIGR00651 | ph  | Fermentation                                                                    |
| NudE | ADP-ribose diphosphatase                      | 7.04   | 1.11  | 6.71   | 1.42 | 1.05 | 0.07 | 0.07  | N/A                   | N/A       | N/A |                                                                                 |
| MetE | 5-methyltetrahydropteroylglutamate--          | 98.64  | 13.04 | 94.14  | 5.25 | 1.05 | 0.02 | 0.07  | Amino acid biosynth   | TIGR01371 | 5-r | Aspartate family                                                                |
| RplO | 50S ribosomal protein L15                     | 16.71  | 3.90  | 15.97  | 1.73 | 1.05 | 0.07 | 0.07  | Protein synthesis:Rib | TIGR01071 | rib | Ribosomal proteins                                                              |
| RpsG | 30S ribosomal protein S7                      | 30.95  | 2.05  | 29.71  | 2.76 | 1.04 | 0.01 | 0.06  | Protein synthesis:Rib | TIGR01029 | rib | Ribosomal proteins                                                              |
| PanB | 3-methyl-2-oxobutanoate hydroxymethyl         | 4.96   | 0.34  | 4.76   | 0.47 | 1.04 | 0.01 | 0.06  | Biosynthesis of cofad | TIGR00222 | 3-r | Pantothenate and coenzyme A                                                     |
| YdgH | hypothetical protein                          | 7.84   | 0.79  | 7.56   | 0.09 | 1.04 | 0.01 | 0.05  | N/A                   | N/A       | N/A |                                                                                 |
| DapD | 2,3,4,5-tetrahydropyridine-2-carboxylate      | 32.17  | 11.31 | 31.07  | 4.26 | 1.04 | 0.14 | 0.05  | Amino acid biosynth   | TIGR00965 | 2,3 | Aspartate family                                                                |
| ArgD | bifunctional acetylornithine aminotransfer    | 8.71   | 1.72  | 8.41   | 2.28 | 1.04 | 0.11 | 0.05  | Energy metabolism:    | TIGR00707 | ace | Amino acids and amines                                                          |
| MoaB | molybdopterin biosynthesis protein B          | 5.21   | 6.13  | 5.04   | 0.89 | 1.03 | 1.41 | 0.05  | Biosynthesis of cofad | TIGR00177 | mo  | Molybdopterin                                                                   |
| YfiO | predicted lipoprotein                         | 5.79   | 0.88  | 5.6    | 2.11 | 1.03 | 0.17 | 0.05  | Protein fate:Protein  | TIGR03302 | ou  | Protein and peptide secretion and trafficking                                   |
| AccD | acetyl-CoA carboxylase subunit beta           | 12.72  | 1.09  | 12.33  | 1.43 | 1.03 | 0.02 | 0.04  | Fatty acid and phosph | TIGR00515 | ace | Biosynthesis                                                                    |
| GuaA | bifunctional GMP synthase/glutamine ami       | 11.83  | 2.35  | 11.48  | 0.62 | 1.03 | 0.04 | 0.04  | Purines, pyrimidines  | TIGR00884 | GM  | Purine ribonucleotide biosynthesis                                              |
| HisS | histidyl-tRNA synthetase                      | 20.19  | 1.62  | 19.59  | 1.05 | 1.03 | 0.01 | 0.04  | Protein synthesis:tr  | TIGR00442 | his | tRNA aminoacylation                                                             |
| BetB | betaine aldehyde dehydrogenase, NAD-de        | 6.60   | 0.76  | 6.44   | 1.23 | 1.02 | 0.05 | 0.04  | Cellular processes:Ad | TIGR01804 | bet | Adaptations to atypical conditions                                              |
| PurH | bifunctional phosphoribosylaminoimidazol      | 19.43  | 4.07  | 19.03  | 3.44 | 1.02 | 0.08 | 0.03  | Purines, pyrimidines  | TIGR00355 | ph  | Purine ribonucleotide biosynthesis                                              |
| IhfA | integration host factor subunit alpha         | 10.30  | 0.46  | 10.09  | 2.56 | 1.02 | 0.07 | 0.03  | DNA metabolism:DN     | TIGR00987 | int | DNA replication, recombination, and repair                                      |
| SerS | seryl-tRNA synthetase                         | 19.14  | 5.06  | 18.76  | 0.6  | 1.02 | 0.07 | 0.03  | Protein synthesis:tr  | TIGR00414 | ser | tRNA aminoacylation                                                             |
| RpsC | 30S ribosomal protein S3                      | 29.99  | 2.34  | 29.4   | 2.93 | 1.02 | 0.02 | 0.03  | Protein synthesis:Rib | TIGR01009 | rib | Ribosomal proteins                                                              |
| RpmC | 50S ribosomal protein L29                     | 15.42  | 4.21  | 15.14  | 1.85 | 1.02 | 0.09 | 0.03  | Protein synthesis:Rib | TIGR00012 | rib | Ribosomal proteins                                                              |
| CarA | carbamoyl-phosphate synthase small subu       | 10.28  | 1.68  | 10.1   | 2.32 | 1.02 | 0.08 | 0.03  | Purines, pyrimidines  | TIGR01368 | car | Pyrimidine ribonucleotide biosynthesis                                          |
| CarB | carbamoyl-phosphate synthase large subu       | 36.44  | 4.90  | 35.87  | 3.09 | 1.02 | 0.03 | 0.02  | Purines, pyrimidines  | TIGR01369 | car | Pyrimidine ribonucleotide biosynthesis                                          |
| YfiF | predicted methyltransferase                   | 5.40   | 3.11  | 5.32   | 0.51 | 1.02 | 0.34 | 0.02  | N/A                   | N/A       | N/A |                                                                                 |
| FusA | elongation factor EF-2                        | 119.74 | 5.59  | 118.44 | 9.23 | 1.01 | 0.01 | 0.02  | Protein synthesis:Tra | TIGR00231 | sm  | Translation factors                                                             |
| YidA | predicted hydrolase                           | 5.10   | 3.70  | 5.05   | 0.9  | 1.01 | 0.56 | 0.02  | Unknown function:En   | TIGR00099 | Co  | Enzymes of unknown specificity                                                  |
| HisC | histidinol-phosphate aminotransferase         | 8.49   | 3.91  | 8.41   | 1.71 | 1.01 | 0.25 | 0.01  | Amino acid biosynth   | TIGR01141 | his | Histidine family                                                                |
| VacB | putative enzyme                               | 8.19   | 1.56  | 8.12   | 1.29 | 1.01 | 0.06 | 0.01  | Transcription:Degrad  | TIGR00358 | Va  | Degradation of RNA                                                              |
| PurL | phosphoribosylformylglycinamide synth         | 21.37  | 1.67  | 21.25  | 5.23 | 1.01 | 0.07 | 0.01  | Purines, pyrimidines  | TIGR01735 | ph  | Purine ribonucleotide biosynthesis                                              |
| DacA | D-alanyl-D-alanine carboxypeptidase (pen      | 8.15   | 2.04  | 8.12   | 1.21 | 1.00 | 0.09 | 0.01  | N/A                   | N/A       | N/A |                                                                                 |
| PfkB | 6-phosphofructokinase II; suppressor of p     | 7.03   | 0.94  | 7      | 0.95 | 1.00 | 0.04 | 0.01  | N/A                   | TIGR03168 | hex | N/A                                                                             |
| ArgB | acetylglutamate kinase (RefSeq)               | 5.33   | 1.77  | 5.31   | 2.05 | 1.00 | 0.26 | 0.00  | Amino acid biosynth   | TIGR00761 | ace | Glutamate family                                                                |
| LeuS | leucyl-tRNA synthetase                        | 17.12  | 3.83  | 17.09  | 2.96 | 1.00 | 0.08 | 0.00  | Protein synthesis:tr  | TIGR00396 | leu | tRNA aminoacylation                                                             |
| LeuC | isopropylmalate isomerase large subunit       | 28.88  | 1.49  | 28.83  | 2.66 | 1.00 | 0.01 | 0.00  | Amino acid biosynth   | TIGR00170 | 3-i | Pyruvate family                                                                 |
| RpsD | 30S ribosomal protein S4                      | 29.08  | 6.04  | 29.12  | 2.54 | 1.00 | 0.05 | 0.00  | Protein synthesis:Rib | TIGR01017 | rib | Ribosomal proteins                                                              |
| Pfs  | 5'-methylthioadenosine/S-adenosylhomoc        | 5.86   | 2.26  | 5.87   | 0.78 | 1.00 | 0.17 | 0.00  | Purines, pyrimidines  | TIGR01704 | MT  | Salvage of nucleosides and nucleotides                                          |
| GlyA | serine hydroxymethyltransferase               | 42.12  | 4.26  | 42.26  | 2.98 | 1.00 | 0.02 | 0.00  | N/A                   | N/A       | N/A |                                                                                 |
| NemA | N-ethylmaleimide reductase, FMN-linked        | 18.95  | 1.68  | 19.04  | 0.74 | 1.00 | 0.01 | -0.01 | N/A                   | N/A       | N/A |                                                                                 |
| PheS | phenylalanyl-tRNA synthetase alpha subu       | 13.27  | 2.34  | 13.45  | 0.99 | 0.99 | 0.04 | -0.02 | Protein synthesis:tr  | TIGR00468 | phe | tRNA aminoacylation                                                             |
| Eda  | keto-hydroxyglutarate-aldolase/keto-deox      | 7.73   | 2.12  | 7.84   | 0.92 | 0.99 | 0.09 | -0.02 | Energy metabolism:    | TIGR01182 | 2-d | Entner-Doudoroff                                                                |
| MreB | regulator of ftsI, penicillin binding protein | 5.79   | 2.56  | 5.88   | 0.78 | 0.98 | 0.21 | -0.02 | Cell envelope:Bio     | TIGR00904 | cel | Biosynthesis and degradation of murein sacculus and peptidoglycan               |
| AspS | aspartyl-tRNA synthetase                      | 37.45  | 2.85  | 38.08  | 0.07 | 0.98 | 0.01 | -0.02 | Protein synthesis:tr  | TIGR00459 | asp | tRNA aminoacylation                                                             |
| AtpH | FOF1 ATP synthase subunit delta               | 11.57  | 1.77  | 11.77  | 2.31 | 0.98 | 0.06 | -0.02 | Energy metabolism:    | TIGR01145 | AT  | ATP-proton motive force interconversion                                         |
| LysS | lysine tRNA synthetase, constitutive          | 15.40  | 3.95  | 15.68  | 0.78 | 0.98 | 0.07 | -0.03 | Protein synthesis:tr  | TIGR00499 | lys | tRNA aminoacylation                                                             |
| RpsT | 30S ribosomal protein S20                     | 8.52   | 2.80  | 8.68   | 0.53 | 0.98 | 0.11 | -0.03 | Protein synthesis:Rib | TIGR00029 | rib | Ribosomal proteins                                                              |
| OppA | oligopeptide transporter subunit              | 31.06  | 4.79  | 31.66  | 2.82 | 0.98 | 0.03 | -0.03 | N/A                   | N/A       | N/A |                                                                                 |
| NusG | transcription antitermination protein NusC    | 11.80  | 3.32  | 12.03  | 1.15 | 0.98 | 0.09 | -0.03 | Transcription:Transc  | TIGR00922 | tra | Transcription factors                                                           |
| ArgH | argininosuccinate lyase                       | 10.71  | 0.27  | 10.94  | 2.61 | 0.98 | 0.06 | -0.03 | Amino acid biosynth   | TIGR00838 | arg | Glutamate family                                                                |
| AlaS | alanyl-tRNA synthetase                        | 28.77  | 2.68  | 29.4   | 4.42 | 0.98 | 0.03 | -0.03 | Protein synthesis:tr  | TIGR00344 | ala | tRNA aminoacylation                                                             |
| RplN | 50S ribosomal protein L14                     | 9.30   | 3.77  | 9.53   | 0.56 | 0.98 | 0.17 | -0.04 | Protein synthesis:Rib | TIGR01067 | rib | Ribosomal proteins                                                              |
| DnaK | molecular chaperone DnaK                      | 36.44  | 5.16  | 37.55  | 3.11 | 0.97 | 0.03 | -0.04 | Protein fate:Protein  | TIGR02350 | cha | Protein folding and stabilization                                               |
| PpiB | peptidyl-prolyl cis-trans isomerase B (rota   | 8.43   | 4.42  | 8.69   | 1.99 | 0.97 | 0.33 | -0.04 | N/A                   | N/A       | N/A |                                                                                 |
| RpiA | ribose-5-phosphate isomerase A                | 9.50   | 1.06  | 9.8    | 0.46 | 0.97 | 0.01 | -0.04 | Energy metabolism:    | TIGR00021 | rib | Pentose phosphate pathway                                                       |
| RpsR | 30S ribosomal protein S18                     | 9.45   | 2.40  | 9.8    | 0.46 | 0.96 | 0.07 | -0.05 | Protein synthesis:Rib | TIGR00165 | rib | Ribosomal proteins                                                              |
| LepA | GTP-binding protein LepA                      | 5.36   | 0.73  | 5.59   | 1.91 | 0.96 | 0.14 | -0.06 | Unknown function:G    | TIGR00231 | sm  | General                                                                         |
| MurA | UDP-N-acetylglucosamine 1-carboxyvinyl        | 6.99   | 0.34  | 7.29   | 1.03 | 0.96 | 0.02 | -0.06 | Cell envelope:Bio     | TIGR01072 | UD  | Biosynthesis and degradation of murein sacculus and peptidoglycan               |
| AccC | acetyl-CoA carboxylase                        | 9.11   | 1.34  | 9.51   | 1.68 | 0.96 | 0.05 | -0.06 | Fatty acid and phosph | TIGR00514 | ace | Biosynthesis                                                                    |
| YchF | translation-associated GTPase                 | 7.76   | 1.38  | 8.11   | 1.65 | 0.96 | 0.07 | -0.06 | Unknown function:G    | TIGR00092 | GT  | General                                                                         |
| AhpF | alkyl hydroperoxide reductase, F52a subu      | 16.60  | 3.05  | 17.36  | 0.4  | 0.96 | 0.03 | -0.06 | Cellular processes:Ad | TIGR03140 | alk | Adaptations to atypical conditions                                              |
| Pgi  | glucose-6-phosphate isomerase                 | 12.30  | 1.47  | 12.89  | 2.79 | 0.95 | 0.06 | -0.07 | N/A                   | N/A       | N/A |                                                                                 |
| HemL | glutamate-1-semialdehyde aminotransfer        | 20.19  | 1.69  | 21.27  | 2.41 | 0.95 | 0.02 | -0.08 | Biosynthesis of cofad | TIGR00713 | glu | Heme, porphyrin, and cobalamin                                                  |

|       |                                            |       |       |       |      |      |      |       |                       |                |                                                                                 |
|-------|--------------------------------------------|-------|-------|-------|------|------|------|-------|-----------------------|----------------|---------------------------------------------------------------------------------|
| IlyC  | ketol-acid reductoisomerase                | 52.98 | 11.17 | 56.54 | 3.47 | 0.94 | 0.05 | -0.09 | Amino acid biosynth   | TIGR00465 ket  | Pyruvate family                                                                 |
| ValS  | valyl-tRNA synthetase                      | 23.11 | 2.26  | 24.66 | 1.54 | 0.94 | 0.01 | -0.09 | Protein synthesis:tr  | TIGR00422 val  | tRNA aminoacylation                                                             |
| RpoB  | DNA-directed RNA polymerase subunit be     | 70.83 | 8.67  | 76.16 | 3.59 | 0.93 | 0.02 | -0.10 | Transcription:DNA-d   | TIGR02013 DN   | DNA-dependent RNA polymerase                                                    |
| PfkA  | 6-phosphofructokinase                      | 17.14 | 5.96  | 18.47 | 1.47 | 0.93 | 0.13 | -0.11 | Energy metabolism:m   | TIGR02482 6-p  | Glycolysis/gluconeogenesis                                                      |
| PrsA  | ribose-phosphate pyrophosphokinase         | 28.01 | 2.03  | 30.24 | 2.1  | 0.93 | 0.01 | -0.11 | Purines, pyrimidines  | TIGR01251 rib  | Purine ribonucleotide biosynthesis                                              |
| b2511 | putative GTP-binding factor                | 7.77  | 2.92  | 8.4   | 1.4  | 0.93 | 0.17 | -0.11 | Protein synthesis:Ot  | TIGR00231 sm   | Other                                                                           |
| DegP  | serine endoprotease (protease Do), memt    | 6.99  | 0.34  | 7.56  | 0.86 | 0.92 | 0.02 | -0.11 | Protein fate:Degrada  | TIGR02037 pro  | Degradation of proteins, peptides, and glycopeptides                            |
| PepP  | proline aminopeptidase P II                | 8.26  | 0.99  | 8.95  | 1.64 | 0.92 | 0.05 | -0.12 | N/A                   | N/A            | N/A                                                                             |
| B2294 | orf, hypothetical protein                  | 11.87 | 1.83  | 12.86 | 2.54 | 0.92 | 0.06 | -0.12 | N/A                   | N/A            | N/A                                                                             |
| Tsf   | elongation factor Ts                       | 25.29 | 4.64  | 27.43 | 4    | 0.92 | 0.05 | -0.12 | Protein synthesis:Tra | TIGR00116 tra  | Translation factors                                                             |
| PtsI  | PEP-protein phosphotransferase of PTS sy   | 56.15 | 3.74  | 61.36 | 3.74 | 0.92 | 0.01 | -0.13 | N/A                   | TIGR01417 ph   | N/A                                                                             |
| GroS  | co-chaperonin GroES                        | 17.12 | 5.92  | 18.77 | 1.19 | 0.91 | 0.12 | -0.13 | N/A                   | N/A            | N/A                                                                             |
| RpsJ  | 30S ribosomal protein S10                  | 23.16 | 5.53  | 25.5  | 5.71 | 0.91 | 0.11 | -0.14 | Protein synthesis:Rib | TIGR01049 rib  | Ribosomal proteins                                                              |
| FabF  | 3-oxoacyl-(acyl carrier protein) synthase  | 18.56 | 2.24  | 20.45 | 1.45 | 0.91 | 0.02 | -0.14 | Fatty acid and phosph | TIGR03150 bet  | Biosynthesis                                                                    |
| PurD  | phosphoribosylamine--glycine ligase        | 6.58  | 0.44  | 7.27  | 1.21 | 0.91 | 0.03 | -0.14 | Purines, pyrimidines  | TIGR00877 ph   | Purine ribonucleotide biosynthesis                                              |
| ArgS  | arginyl-tRNA synthetase                    | 7.60  | 4.25  | 8.39  | 1.59 | 0.91 | 0.35 | -0.14 | Protein synthesis:tr  | TIGR00456 arg  | tRNA aminoacylation                                                             |
| TyrA  | fused chorismate mutase T/prephenate de    | 60.39 | 4.44  | 66.94 | 1.28 | 0.90 | 0.01 | -0.15 | Amino acid biosynth   | TIGR01799 ch   | Aromatic amino acid family                                                      |
| Frr   | ribosome releasing factor                  | 5.77  | 1.39  | 6.43  | 2.06 | 0.90 | 0.16 | -0.16 | Protein synthesis:Tra | TIGR00496 rib  | Translation factors                                                             |
| ThrA  | bifunctional aspartokinase I/homoserine d  | 25.50 | 1.19  | 28.56 | 3.35 | 0.89 | 0.02 | -0.16 | Amino acid biosynth   | TIGR00657 asp  | Aspartate family                                                                |
| DapB  | dihydrodipicolinate reductase              | 7.75  | 2.38  | 8.69  | 1.35 | 0.89 | 0.12 | -0.17 | Amino acid biosynth   | TIGR00036 di   | Aspartate family                                                                |
| HisJ  | histidine/lysine/arginine/ornithine transp | 9.94  | 1.80  | 11.2  | 0.55 | 0.89 | 0.04 | -0.17 | Transport and bindin  | TIGR01096 lys  | Amino acids, peptides and amines                                                |
| BipA  | GTP-binding protein                        | 16.80 | 2.67  | 19.04 | 3.49 | 0.88 | 0.06 | -0.18 | Protein synthesis:Tra | TIGR00231 sm   | Translation factors                                                             |
| CysP  | thiosulfate transporter subunit            | 20.98 | 1.93  | 23.78 | 4.38 | 0.88 | 0.04 | -0.18 | Transport and bindin  | TIGR00971 sul  | Anions                                                                          |
| RplP  | 50S ribosomal protein L16                  | 15.73 | 2.64  | 17.92 | 1.63 | 0.88 | 0.04 | -0.19 | Protein synthesis:Rib | TIGR01164 rib  | Ribosomal proteins                                                              |
| RplJ  | 50S ribosomal protein L10                  | 25.46 | 1.43  | 29.1  | 5.53 | 0.87 | 0.04 | -0.19 | N/A                   | N/A            | N/A                                                                             |
| Upp   | uracil phosphoribosyltransferase           | 8.56  | 1.92  | 9.79  | 0.85 | 0.87 | 0.06 | -0.19 | Purines, pyrimidines  | TIGR01091 ura  | Salvage of nucleosides and nucleotides                                          |
| GlnS  | glutaminyl-tRNA synthetase                 | 7.06  | 2.21  | 8.11  | 1.89 | 0.87 | 0.15 | -0.20 | Protein synthesis:tr  | TIGR00440 glu  | tRNA aminoacylation                                                             |
| Tig   | trigger factor                             | 49.35 | 8.13  | 56.81 | 4.9  | 0.87 | 0.03 | -0.20 | Protein fate:Protein  | TIGR00115 trig | Protein folding and stabilization                                               |
| ClpB  | protein disaggregation chaperone           | 35.94 | 3.05  | 41.42 | 5.53 | 0.87 | 0.03 | -0.20 | Protein fate:Protein  | TIGR03346 AT   | Protein folding and stabilization                                               |
| RpsA  | 30S ribosomal protein S1                   | 45.85 | 6.72  | 52.9  | 7.71 | 0.87 | 0.04 | -0.21 | Protein synthesis:Rib | TIGR00717 rib  | Ribosomal proteins                                                              |
| RpoC  | DNA-directed RNA polymerase subunit be     | 63.56 | 5.57  | 73.37 | 1.19 | 0.87 | 0.01 | -0.21 | Transcription:DNA-d   | TIGR02386 DN   | DNA-dependent RNA polymerase                                                    |
| PurB  | adenylosuccinate lyase                     | 9.71  | 3.91  | 11.21 | 2.17 | 0.87 | 0.20 | -0.21 | Purines, pyrimidines  | TIGR00928 ad   | Purine ribonucleotide biosynthesis                                              |
| IscS  | cysteine desulfurase                       | 20.47 | 2.75  | 23.79 | 2.71 | 0.86 | 0.03 | -0.22 | Protein synthesis:tr  | TIGR02006 cyst | tRNA and rRNA base modification                                                 |
| TrpE  | anthranilate synthase component I          | 9.83  | 1.61  | 11.47 | 1.6  | 0.86 | 0.05 | -0.22 | Amino acid biosynth   | TIGR00565 ant  | Aromatic amino acid family                                                      |
| ThrC  | threonine synthase                         | 20.01 | 4.97  | 23.52 | 2.09 | 0.85 | 0.07 | -0.23 | Amino acid biosynth   | TIGR00260 thr  | Aspartate family                                                                |
| AdeH  | fused acetaldehyde-CoA dehydrogenase/I     | 26.36 | 3.75  | 31.07 | 2.68 | 0.85 | 0.03 | -0.24 | N/A                   | N/A            | N/A                                                                             |
| HisG  | ATP phosphoribosyltransferase              | 7.36  | 1.71  | 8.68  | 2.58 | 0.85 | 0.14 | -0.24 | Amino acid biosynth   | TIGR00070 AT   | Histidine family                                                                |
| GshA  | glutamate--cysteine ligase                 | 4.96  | 0.34  | 5.88  | 1.42 | 0.84 | 0.06 | -0.25 | Biosynthesis of cofa  | TIGR01434 glu  | Glutathione and analogs                                                         |
| AccA  | acetyl-CoA carboxylase subunit alpha       | 18.15 | 2.08  | 21.58 | 3.38 | 0.84 | 0.04 | -0.25 | Fatty acid and phosph | TIGR00513 ace  | Biosynthesis                                                                    |
| DppA  | dipeptide transporter                      | 22.61 | 1.64  | 26.89 | 0.32 | 0.84 | 0.01 | -0.25 | N/A                   | N/A            | N/A                                                                             |
| RplM  | 50S ribosomal protein L13                  | 8.71  | 1.72  | 10.37 | 2.16 | 0.84 | 0.08 | -0.25 | Protein synthesis:Rib | TIGR01066 rib  | Ribosomal proteins                                                              |
| YfbF  | undecaprenyl phosphate-L-Ara4FN transfe    | 5.40  | 1.09  | 6.44  | 1.29 | 0.84 | 0.08 | -0.25 | N/A                   | N/A            | N/A                                                                             |
| NuoC  | NADH:ubiquinone oxidoreductase, chain C    | 8.67  | 0.59  | 10.36 | 1.74 | 0.84 | 0.03 | -0.26 | Energy metabolism:m   | TIGR01961 NA   | Electron transport                                                              |
| PurT  | phosphoribosylglycinamide formyltransfer   | 5.84  | 4.17  | 7.01  | 1.35 | 0.83 | 0.55 | -0.26 | Purines, pyrimidines  | TIGR01142 ph   | Purine ribonucleotide biosynthesis                                              |
| NusA  | transcription elongation factor NusA       | 17.64 | 1.46  | 21.26 | 2.7  | 0.83 | 0.02 | -0.27 | Transcription:Transc  | TIGR01953 tra  | Transcription factors                                                           |
| RfaE  | fused heptose 7-phosphate kinase/heptos    | 9.50  | 1.06  | 11.47 | 1.6  | 0.83 | 0.03 | -0.27 | Cell envelope:BioSyn  | TIGR00125 cyt  | Biosynthesis and degradation of surface polysaccharides and lipopolysaccharides |
| GlyS  | glycyl-tRNA synthetase subunit beta        | 17.12 | 3.83  | 20.71 | 4.84 | 0.83 | 0.10 | -0.27 | Protein synthesis:tr  | TIGR00211 gly  | tRNA aminoacylation                                                             |
| GlnA  | glutamine synthetase                       | 9.02  | 2.78  | 10.92 | 1.68 | 0.83 | 0.12 | -0.28 | Amino acid biosynth   | TIGR00653 glu  | Glutamate family                                                                |
| YgfZ  | putative global regulator                  | 6.71  | 2.96  | 8.13  | 0.58 | 0.83 | 0.20 | -0.28 | Protein synthesis:tr  | TIGR03317 fol  | tRNA and rRNA base modification                                                 |
| DadA  | D-amino acid dehydrogenase small subuni    | 5.75  | 0.40  | 6.99  | 3.39 | 0.82 | 0.24 | -0.28 | N/A                   | N/A            | N/A                                                                             |
| RplQ  | 50S ribosomal protein L17                  | 15.18 | 2.07  | 18.47 | 1.47 | 0.82 | 0.02 | -0.28 | Protein synthesis:Rib | TIGR00059 rib  | Ribosomal proteins                                                              |
| RbfA  | ribosome-binding factor A                  | 5.29  | 1.54  | 6.44  | 1    | 0.82 | 0.11 | -0.28 | Transcription:RNA p   | TIGR00082 rib  | rRNA processing                                                                 |
| RplF  | 50S ribosomal protein L6                   | 24.38 | 3.58  | 29.69 | 3.44 | 0.82 | 0.03 | -0.28 | Protein synthesis:Rib | TIGR03654 rib  | Ribosomal proteins                                                              |
| YibN  | predicted rhodanese-related sulfurtransfe  | 5.71  | 1.67  | 7     | 0.93 | 0.82 | 0.10 | -0.29 | N/A                   | N/A            | N/A                                                                             |
| HisB  | imidazoleglycerolphosphate dehydratase     | 4.99  | 1.52  | 6.15  | 1.21 | 0.81 | 0.13 | -0.30 | Amino acid biosynth   | TIGR01261 his  | Histidine family                                                                |
| AceE  | pyruvate dehydrogenase subunit E1          | 77.27 | 12.78 | 95.2  | 2.46 | 0.81 | 0.03 | -0.30 | N/A                   | TIGR00759 pyr  | N/A                                                                             |
| Zwf   | glucose-6-phosphate 1-dehydrogenase        | 12.22 | 2.91  | 15.12 | 1.36 | 0.81 | 0.06 | -0.31 | Energy metabolism:m   | TIGR00871 glu  | Pentose phosphate pathway                                                       |
| IleS  | isoleucyl-tRNA synthetase                  | 20.73 | 6.08  | 25.75 | 4.02 | 0.80 | 0.11 | -0.31 | Protein synthesis:tr  | TIGR00392 iso  | tRNA aminoacylation                                                             |
| RpsP  | 30S ribosomal protein S16                  | 8.95  | 3.46  | 11.21 | 1.09 | 0.80 | 0.16 | -0.32 | Protein synthesis:Rib | TIGR00002 rib  | Ribosomal proteins                                                              |
| GyrB  | DNA gyrase subunit B                       | 8.71  | 1.72  | 10.93 | 1.54 | 0.80 | 0.06 | -0.33 | DNA metabolism:DN     | TIGR01059 DN   | DNA replication, recombination, and repair                                      |
| AtpF  | FOF1 ATP synthase subunit B                | 11.15 | 0.76  | 14.01 | 1.43 | 0.80 | 0.02 | -0.33 | Energy metabolism:m   | TIGR01144 AT   | ATP-proton motive force interconversion                                         |
| YebL  | putative adhesin                           | 23.96 | 2.38  | 30.26 | 1.8  | 0.79 | 0.01 | -0.34 | N/A                   | N/A            | N/A                                                                             |

|       |                                               |        |       |        |       |      |      |       |                       |               |                                                                                 |
|-------|-----------------------------------------------|--------|-------|--------|-------|------|------|-------|-----------------------|---------------|---------------------------------------------------------------------------------|
| GroEL | chaperonin GroEL                              | 101.82 | 3.08  | 128.79 | 4.86  | 0.79 | 0.00 | -0.34 | Protein fate:Protein  | TIGR02348 cha | Protein folding and stabilization                                               |
| Rho   | transcription termination factor Rho          | 39.16  | 10.14 | 49.59  | 2.17  | 0.79 | 0.07 | -0.34 | Transcription:Trans   | TIGR00767 tra | Transcription factors                                                           |
| PepD  | aminoacyl-histidine dipeptidase (peptidase)   | 7.73   | 2.12  | 9.79   | 2.03  | 0.79 | 0.12 | -0.34 | N/A                   | TIGR01893 am  | N/A                                                                             |
| GlnH  | glutamine ABC transporter periplasmic protein | 7.49   | 1.75  | 9.52   | 0.91  | 0.79 | 0.06 | -0.35 | N/A                   | N/A           | N/A                                                                             |
| SoiA  | N-methyltryptophan oxidase, FAD-binding       | 5.29   | 1.54  | 6.73   | 0.9   | 0.79 | 0.10 | -0.35 | N/A                   | N/A           | N/A                                                                             |
| TrxA  | thioredoxin 1                                 | 10.28  | 1.68  | 13.17  | 1.42  | 0.78 | 0.04 | -0.36 | Energy metabolism:En  | TIGR01068 thi | Electron transport                                                              |
| Ppc   | phosphoenolpyruvate carboxylase               | 36.92  | 3.34  | 47.33  | 3.81  | 0.78 | 0.01 | -0.36 | N/A                   | N/A           | N/A                                                                             |
| RpoA  | DNA-directed RNA polymerase subunit alpha     | 39.25  | 6.35  | 50.41  | 7.74  | 0.78 | 0.05 | -0.36 | Transcription:DNA-d   | TIGR02027 DN  | DNA-dependent RNA polymerase                                                    |
| AceF  | dihydrolipoamide acetyltransferase            | 37.16  | 2.52  | 47.88  | 3.42  | 0.78 | 0.01 | -0.37 | Energy metabolism:En  | TIGR01348 di  | Pyruvate dehydrogenase                                                          |
| YeeZ  | predicted epimerase, with NAD(P)-binding      | 7.80   | 1.71  | 10.09  | 2.26  | 0.77 | 0.10 | -0.37 | N/A                   | N/A           | N/A                                                                             |
| PyrG  | CTP synthetase                                | 12.35  | 0.96  | 15.97  | 0.19  | 0.77 | 0.01 | -0.37 | Purines, pyrimidines  | TIGR00337 CT  | Pyrimidine ribonucleotide biosynthesis                                          |
| PanC  | pantoate--beta-alanine ligase                 | 6.49   | 2.20  | 8.4    | 0.76  | 0.77 | 0.12 | -0.37 | Biosynthesis of cofa  | TIGR00018 pan | Pantothenate and coenzyme A                                                     |
| PykA  | pyruvate kinase                               | 19.91  | 3.52  | 25.77  | 4.05  | 0.77 | 0.06 | -0.37 | Energy metabolism:En  | TIGR01064 pyr | Glycolysis/gluconeogenesis                                                      |
| YjjK  | fused predicted transporter subunits of ABC   | 10.32  | 0.89  | 13.44  | 1.68  | 0.77 | 0.02 | -0.38 | N/A                   | TIGR03719 AT  | N/A                                                                             |
| HupB  | HU, DNA-binding transcriptional regulator     | 6.88   | 4.21  | 8.96   | 1.26  | 0.77 | 0.39 | -0.38 | N/A                   | N/A           | N/A                                                                             |
| PurA  | adenylosuccinate synthetase                   | 24.46  | 6.12  | 31.92  | 1.96  | 0.77 | 0.07 | -0.38 | Purines, pyrimidines  | TIGR00184 ad  | Purine ribonucleotide biosynthesis                                              |
| GltA  | citrate synthase                              | 49.59  | 6.37  | 64.72  | 2.95  | 0.77 | 0.02 | -0.38 | Energy metabolism:En  | TIGR01798 cit | TCA cycle                                                                       |
| LeuB  | 3-isopropylmalate dehydrogenase               | 32.57  | 2.02  | 42.87  | 3.76  | 0.76 | 0.01 | -0.40 | Amino acid biosynth   | TIGR00169 3-i | Pyruvate family                                                                 |
| YciK  | short chain dehydrogenase                     | 6.14   | 0.84  | 8.12   | 2.11  | 0.76 | 0.09 | -0.40 | N/A                   | N/A           | N/A                                                                             |
| AroG  | 3-deoxy-D-arabino-heptulosonate-7-phosphat    | 28.53  | 7.56  | 37.81  | 2.64  | 0.75 | 0.08 | -0.41 | Amino acid biosynth   | TIGR00034 3-d | Aromatic amino acid family                                                      |
| Tas   | predicted oxidoreductase, NAD(P)(H)-depend    | 5.25   | 2.29  | 7.01   | 2.15  | 0.75 | 0.28 | -0.42 | N/A                   | N/A           | N/A                                                                             |
| PheT  | phenylalanyl-tRNA synthetase beta subunit     | 50.42  | 6.42  | 67.54  | 11.1  | 0.75 | 0.04 | -0.42 | Protein synthesis:TR  | TIGR00472 phe | tRNA aminoacylation                                                             |
| NrdA  | ribonucleotide-diphosphate reductase alpha    | 8.74   | 2.57  | 11.77  | 0.95  | 0.74 | 0.09 | -0.43 | Purines, pyrimidines  | TIGR02506 rib | 2'-Deoxyribonucleotide metabolism                                               |
| LeuD  | isopropylmalate isomerase small subunit       | 13.18  | 0.33  | 17.93  | 0.6   | 0.74 | 0.00 | -0.44 | Amino acid biosynth   | TIGR00171 3-i | Pyruvate family                                                                 |
| RpsK  | 30S ribosomal protein S11                     | 13.79  | 5.05  | 18.77  | 2.2   | 0.73 | 0.15 | -0.44 | Protein synthesis:Rib | TIGR03632 30S | Ribosomal proteins                                                              |
| Adk   | adenylate kinase                              | 12.33  | 3.07  | 17.11  | 2.76  | 0.72 | 0.09 | -0.47 | Purines, pyrimidines  | TIGR01351 ad  | Nucleotide and nucleoside interconversions                                      |
| Apt   | adenine phosphoribosyltransferase             | 7.36   | 2.25  | 10.34  | 3.35  | 0.71 | 0.20 | -0.49 | Purines, pyrimidines  | TIGR01090 ad  | Salvage of nucleosides and nucleotides                                          |
| GlmM  | phosphoglucosamine mutase                     | 6.56   | 1.74  | 9.25   | 1.71  | 0.71 | 0.10 | -0.50 | Central intermediary  | TIGR01455 ph  | Amino sugars                                                                    |
| MetG  | methionyl-tRNA synthetase                     | 15.99  | 1.42  | 22.69  | 2.51  | 0.70 | 0.02 | -0.50 | Protein synthesis:TR  | TIGR00398 met | tRNA aminoacylation                                                             |
| HisA  | N-(5'-phospho-L-ribosyl-formimino)-5-amino    | 9.49   | 1.43  | 13.71  | 1.12  | 0.69 | 0.03 | -0.53 | Amino acid biosynth   | TIGR00007 1-  | Histidine family                                                                |
| ClpP  | ATP-dependent Clp protease proteolytic sub    | 5.81   | 1.03  | 8.41   | 1.71  | 0.69 | 0.07 | -0.53 | Protein fate:Degrada  | TIGR00493 AT  | Degradation of proteins, peptides, and glycopeptides                            |
| AroF  | 3-deoxy-D-arabino-heptulosonate-7-phosphat    | 104.36 | 23.91 | 151.44 | 14.01 | 0.69 | 0.06 | -0.54 | Amino acid biosynth   | TIGR00034 3-d | Aromatic amino acid family                                                      |
| RplI  | 50S ribosomal protein L9                      | 31.89  | 5.92  | 47.33  | 5.62  | 0.67 | 0.05 | -0.57 | Protein synthesis:Rib | TIGR00158 rib | Ribosomal proteins                                                              |
| GutQ  | orf, hypothetical protein                     | 8.63   | 0.99  | 12.88  | 0.33  | 0.67 | 0.01 | -0.58 | Energy metabolism:En  | TIGR00393 sug | Sugars                                                                          |
| NarL  | DNA-binding response regulator in two-co      | 8.23   | 0.29  | 12.31  | 2.01  | 0.67 | 0.03 | -0.58 | N/A                   | N/A           | N/A                                                                             |
| YcdW  | putative dehydrogenase                        | 5.80   | 2.95  | 8.69   | 1.35  | 0.67 | 0.28 | -0.58 | N/A                   | N/A           | N/A                                                                             |
| Eno   | phosphopyruvate hydratase                     | 66.88  | 5.09  | 100.49 | 5.76  | 0.67 | 0.01 | -0.59 | Energy metabolism:En  | TIGR01060 ph  | Glycolysis/gluconeogenesis                                                      |
| PotD  | spermidine/putrescine ABC transporter pe      | 6.14   | 0.84  | 9.24   | 0.74  | 0.66 | 0.02 | -0.59 | N/A                   | N/A           | N/A                                                                             |
| GuaB  | inositol-5-monophosphate dehydrogenase        | 11.90  | 2.10  | 17.94  | 2.3   | 0.66 | 0.05 | -0.59 | Purines, pyrimidines  | TIGR01302 ino | Purine ribonucleotide biosynthesis                                              |
| IlvB  | acetolactate synthase large subunit           | 9.99   | 2.64  | 15.11  | 2.1   | 0.66 | 0.09 | -0.60 | Amino acid biosynth   | TIGR00118 ace | Pyruvate family                                                                 |
| ProS  | prolyl-tRNA synthetase                        | 20.22  | 2.83  | 30.79  | 2.23  | 0.66 | 0.02 | -0.61 | Protein synthesis:TR  | TIGR00409 pro | tRNA aminoacylation                                                             |
| AcnA  | aconitate hydratase                           | 11.04  | 1.75  | 16.82  | 1.65  | 0.66 | 0.03 | -0.61 | Energy metabolism:En  | TIGR01341 ac  | TCA cycle                                                                       |
| RplB  | 50S ribosomal protein L2                      | 27.62  | 1.87  | 42.31  | 2.24  | 0.65 | 0.01 | -0.62 | Protein synthesis:Rib | TIGR01171 rib | Ribosomal proteins                                                              |
| RplE  | 50S ribosomal protein L5                      | 25.48  | 1.47  | 40.04  | 3.14  | 0.64 | 0.01 | -0.65 | N/A                   | N/A           | N/A                                                                             |
| StpA  | DNA binding protein, nucleoid-associated      | 8.56   | 1.92  | 13.46  | 2.36  | 0.64 | 0.08 | -0.65 | N/A                   | N/A           | N/A                                                                             |
| IlvE  | branched-chain amino acid aminotransfer       | 11.93  | 0.91  | 18.77  | 1.48  | 0.64 | 0.01 | -0.65 | Amino acid biosynth   | TIGR01122 bra | Pyruvate family                                                                 |
| RfaD  | ADP-L-glycero-D-mannoheptose-6-epimer         | 9.56   | 2.10  | 15.11  | 1.51  | 0.63 | 0.06 | -0.66 | Cell envelope:Biodyn  | TIGR02197 AD  | Biosynthesis and degradation of surface polysaccharides and lipopolysaccharides |
| FabZ  | (3R)-hydroxymyristoyl ACP dehydratase         | 6.51   | 2.32  | 10.37  | 0.54  | 0.63 | 0.13 | -0.67 | Fatty acid and phosph | TIGR01750 be  | Biosynthesis                                                                    |
| YijJ  | putative transferase                          | 8.40   | 6.13  | 13.45  | 2.32  | 0.62 | 0.56 | -0.68 | N/A                   | N/A           | N/A                                                                             |
| FabB  | 3-oxoacyl-(acyl carrier protein) synthase     | 18.29  | 5.51  | 29.39  | 2.72  | 0.62 | 0.10 | -0.68 | N/A                   | N/A           | N/A                                                                             |
| MoeA  | molybdopterin biosynthesis protein            | 5.31   | 1.15  | 8.68   | 1.72  | 0.61 | 0.09 | -0.71 | N/A                   | TIGR00177 mo  | N/A                                                                             |
| ArgG  | argininosuccinate synthase                    | 12.61  | 3.51  | 20.73  | 1.09  | 0.61 | 0.08 | -0.72 | Amino acid biosynth   | TIGR00032 arg | Glutamate family                                                                |
| IlvD  | dihydroxy-acid dehydratase                    | 40.47  | 2.99  | 66.66  | 2.25  | 0.61 | 0.01 | -0.72 | Amino acid biosynth   | TIGR00110 di  | Pyruvate family                                                                 |
| RplY  | 50S ribosomal protein L25                     | 15.62  | 1.31  | 25.74  | 3.95  | 0.61 | 0.03 | -0.72 | N/A                   | N/A           | N/A                                                                             |
| FtsZ  | cell division protein FtsZ                    | 14.72  | 2.39  | 24.38  | 1.91  | 0.60 | 0.03 | -0.73 | Cellular processes:Ce | TIGR00065 cel | Cell division                                                                   |
| YbeZ  | predicted protein with nucleoside triphosph   | 7.47   | 2.59  | 12.6   | 1.68  | 0.59 | 0.14 | -0.75 | N/A                   | N/A           | N/A                                                                             |
| Usg   | hypothetical protein                          | 12.61  | 3.51  | 21.29  | 2.21  | 0.59 | 0.09 | -0.76 | N/A                   | N/A           | N/A                                                                             |
| KdsA  | 2-dehydro-3-deoxyphosphooctonate aldol        | 9.76   | 2.72  | 16.54  | 1.45  | 0.59 | 0.09 | -0.76 | Cell envelope:Biodyn  | TIGR01362 3-d | Biosynthesis and degradation of surface polysaccharides and lipopolysaccharides |
| GltB  | glutamate synthase, large subunit             | 35.03  | 1.13  | 59.94  | 1.09  | 0.58 | 0.00 | -0.77 | N/A                   | N/A           | N/A                                                                             |
| RplC  | 50S ribosomal protein L3                      | 15.01  | 4.37  | 25.75  | 2.1   | 0.58 | 0.09 | -0.78 | N/A                   | TIGR03625 50S | N/A                                                                             |
| RplD  | 50S ribosomal protein L4                      | 15.27  | 2.69  | 26.88  | 0.62  | 0.57 | 0.03 | -0.82 | Protein synthesis:Rib | TIGR03953 50S | Ribosomal proteins                                                              |
| NadE  | NAD synthetase                                | 6.99   | 0.34  | 12.32  | 1.19  | 0.57 | 0.01 | -0.82 | Biosynthesis of cofa  | TIGR00552 NA  | Pyridine nucleotides                                                            |

|             |                                           |       |      |       |      |      |      |       |                       |                |                                                      |
|-------------|-------------------------------------------|-------|------|-------|------|------|------|-------|-----------------------|----------------|------------------------------------------------------|
| <b>YbiB</b> | hypothetical protein                      | 5.36  | 0.73 | 9.52  | 0.91 | 0.56 | 0.03 | -0.83 | N/A                   | N/A            | N/A                                                  |
| <b>GyrA</b> | DNA gyrase subunit A                      | 6.92  | 2.89 | 12.33 | 1.83 | 0.56 | 0.20 | -0.83 | DNA metabolism:DN     | TIGR01063 DN   | DNA replication, recombination, and repair           |
| <b>LeuA</b> | 2-isopropylmalate synthase                | 10.65 | 1.20 | 19.32 | 4.43 | 0.55 | 0.07 | -0.86 | Amino acid biosynth   | TIGR00973 2-is | Pyruvate family                                      |
| <b>FolE</b> | GTP cyclohydrolase I                      | 14.33 | 2.08 | 26.04 | 3.79 | 0.55 | 0.04 | -0.86 | Biosynthesis of cofad | TIGR00063 GT   | Folic acid                                           |
| <b>Ndk</b>  | nucleoside diphosphate kinase             | 11.37 | 3.59 | 20.73 | 0.46 | 0.55 | 0.10 | -0.87 | N/A                   | N/A            | N/A                                                  |
| <b>NuoG</b> | NADH:ubiquinone oxidoreductase, chain C   | 9.56  | 2.10 | 17.93 | 1.17 | 0.53 | 0.05 | -0.91 | Energy metabolism:3   | TIGR01973 NA   | Electron transport                                   |
| <b>MetF</b> | 5,10-methylenetetrahydrofolate reductase  | 7.01  | 1.40 | 13.17 | 1.42 | 0.53 | 0.05 | -0.91 | Amino acid biosynth   | TIGR00676 5,1  | Aspartate family                                     |
| <b>RpsM</b> | 30S ribosomal protein S13                 | 5.77  | 1.83 | 11.22 | 2.2  | 0.51 | 0.14 | -0.96 | Protein synthesis:Rib | TIGR03631 30S  | Ribosomal proteins                                   |
| <b>SecA</b> | translocase                               | 11.06 | 1.54 | 21.58 | 1.96 | 0.51 | 0.03 | -0.96 | Protein fate:Protein  | TIGR00963 pre  | Protein and peptide secretion and trafficking        |
| <b>RpoD</b> | RNA polymerase sigma factor               | 7.03  | 0.94 | 13.74 | 2.57 | 0.51 | 0.05 | -0.97 | Transcription:Transc  | TIGR02393 RN   | Transcription factors                                |
| <b>GshB</b> | glutathione synthetase                    | 7.01  | 1.40 | 13.71 | 2.8  | 0.51 | 0.08 | -0.97 | Biosynthesis of cofad | TIGR01380 glu  | Glutathione and analogs                              |
| <b>PepN</b> | aminopeptidase N                          | 6.99  | 0.34 | 13.98 | 2.4  | 0.50 | 0.03 | -1.00 | Protein fate:Degrada  | TIGR02414 am   | Degradation of proteins, peptides, and glycopeptides |
| <b>GitX</b> | glutamyl-tRNA synthetase                  | 6.29  | 2.62 | 12.62 | 1.82 | 0.50 | 0.19 | -1.01 | Protein synthesis:tRN | TIGR00464 glu  | tRNA aminoacylation                                  |
| <b>GapA</b> | glyceraldehyde-3-phosphate dehydrogenase  | 18.47 | 1.26 | 37.55 | 3.37 | 0.49 | 0.01 | -1.02 | Energy metabolism:4   | TIGR01534 gly  | Glycolysis/gluconeogenesis                           |
| <b>RplV</b> | 50S ribosomal protein L22                 | 13.05 | 3.38 | 27.45 | 1.32 | 0.48 | 0.07 | -1.07 | Protein synthesis:Rib | TIGR01044 rib  | Ribosomal proteins                                   |
| <b>RplS</b> | 50S ribosomal protein L19                 | 5.45  | 2.30 | 11.77 | 2.31 | 0.46 | 0.22 | -1.11 | Protein synthesis:Rib | TIGR01024 rib  | Ribosomal proteins                                   |
| <b>GitD</b> | glutamate synthase, 4Fe-4S protein, small | 5.44  | 2.26 | 12.89 | 2.05 | 0.42 | 0.20 | -1.25 | N/A                   | TIGR01318 glu  | N/A                                                  |
| <b>TrpS</b> | tryptophanyl-tRNA synthetase              | 6.14  | 0.84 | 16.52 | 1.83 | 0.37 | 0.03 | -1.43 | Protein synthesis:tRN | TIGR00233 try  | tRNA aminoacylation                                  |
| <b>IlvA</b> | threonine dehydratase                     | 6.29  | 2.62 | 18.21 | 0.7  | 0.35 | 0.18 | -1.53 | Amino acid biosynth   | TIGR01124 thr  | Pyruvate family                                      |
